# Supplementary figures and images for: Serum lipidome unravels a diagnostic potential in bile acid diarrhoea
Source: HighWire-hosted journal article supplement (doi:10.1136/gutjnl-2022-329213), 2023-04-18

## SUPPL. FIG. 2

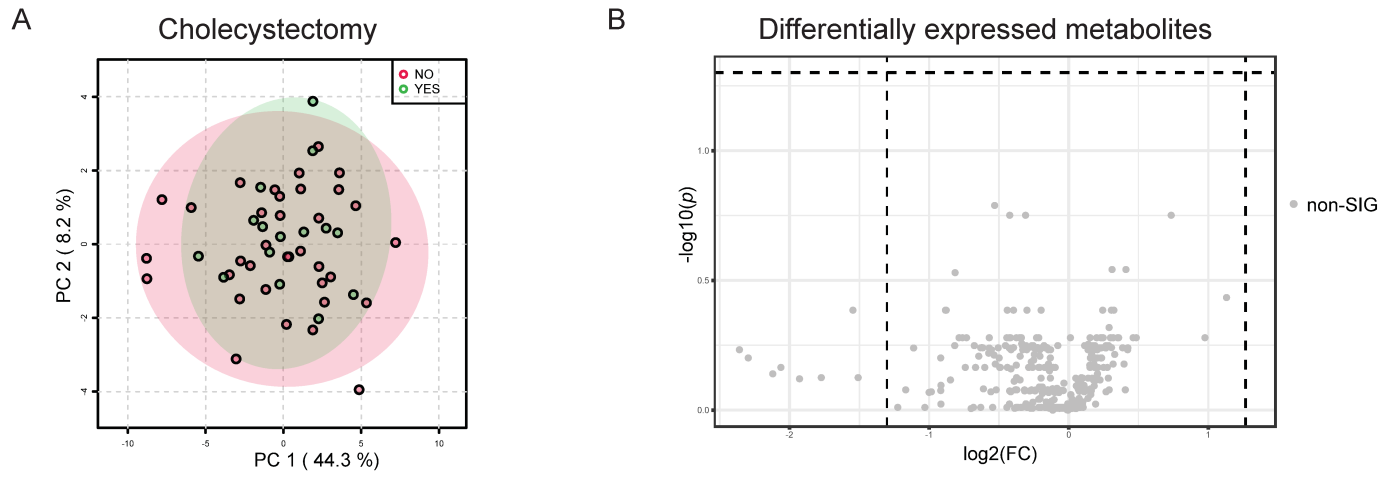

Supplement: gutjnl-2022-329213supp004_data_supplement.pdf [file gutjnl-2022-329213supp004_data_supplement.pdf]

SUPPL. FIG. 4

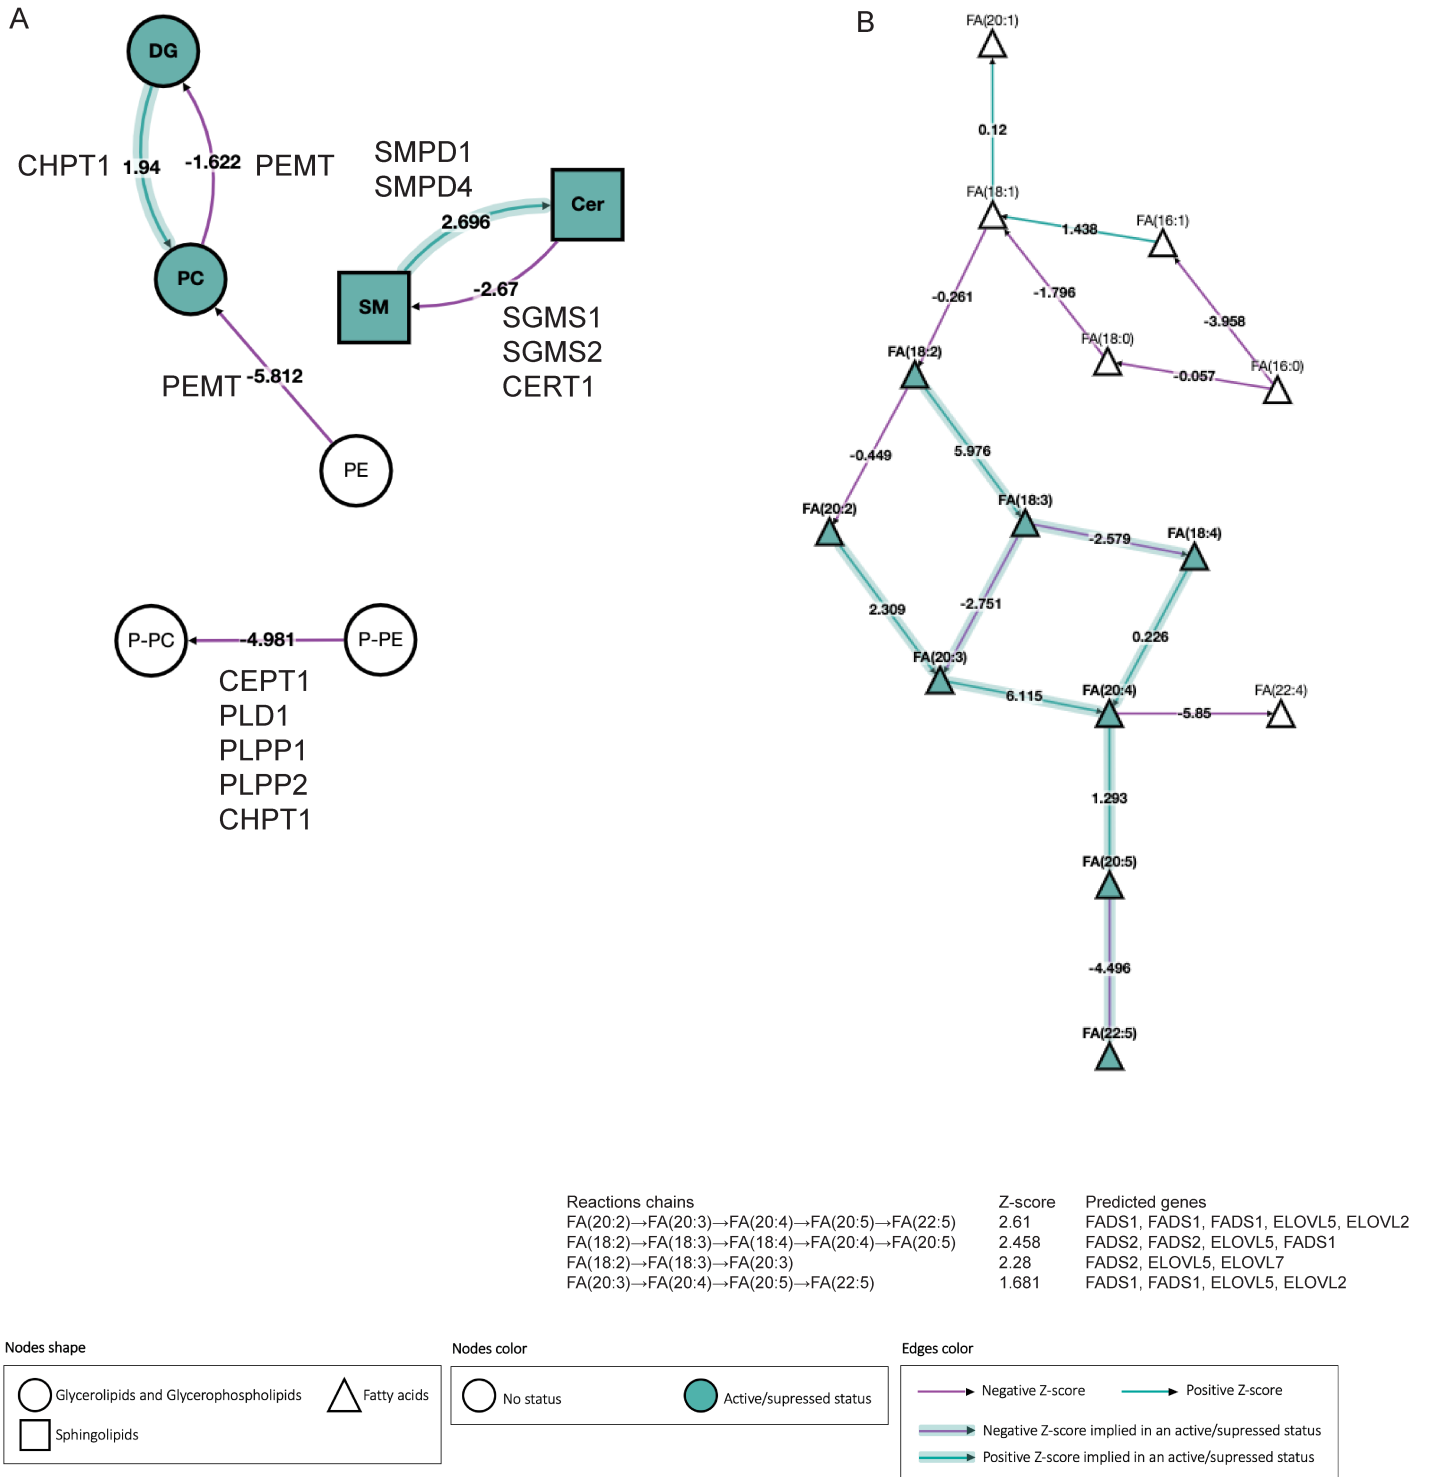

Supplement: gutjnl-2022-329213supp006_data_supplement.pdf [file gutjnl-2022-329213supp006_data_supplement.pdf]
